# Supplementary material for: Trends in Oropharyngeal Cancer Incidence Among Adult Men and Women in the United States From 2001 to 2018
Source: PubMed Central journal article supplement (PMC9339703; doi:10.3389/fonc.2022.926555), 2022-07-18

**Supplemental Table 1.** Basic characteristics of US adult males and females with HPV-related oropharyngeal squamous cell carcinoma (OPSCC) from 2001 to 2018 (N=284,372)

| <b>Characteristics</b> | <b>Frequency (%)</b> |               |
|------------------------|----------------------|---------------|
|                        | <b>Male</b>          | <b>Female</b> |
| <b>Age</b>             |                      |               |
| 20-44                  | 10,594(4.6)          | 2,981(5.4)    |
| 45-64                  | 141,470(61.7)        | 27,973(50.8)  |
| 65+                    | 77,200(33.7)         | 24,154(43.8)  |
| <b>Race</b>            |                      |               |
| Hispanic               | 11,361(5.0)          | 2,533(4.6)    |
| Non-Hispanic White     | 192,494(84.0)        | 45,606(82.8)  |
| Non-Hispanic Black     | 20,565(9.0)          | 5,612(10.2)   |
| Asian/Pacific Islander | 2,555(1.1)           | 835(1.5)      |
| <b>Region</b>          |                      |               |
| Northeast              | 40,164(17.5)         | 10,489(19.0)  |
| Midwest                | 50,503(22.0)         | 12,353(22.4)  |
| South                  | 93,829(40.9)         | 22,115(40.1)  |
| West                   | 44,768(19.5)         | 10,151(18.4)  |

**Supplemental Figure 1.** Age-adjusted incidence of HPV-related oropharyngeal squamous cell carcinoma (OPSCC) from 2001 to 2018 among adults 45-64 years old, stratified by sex. A: Males B: Females

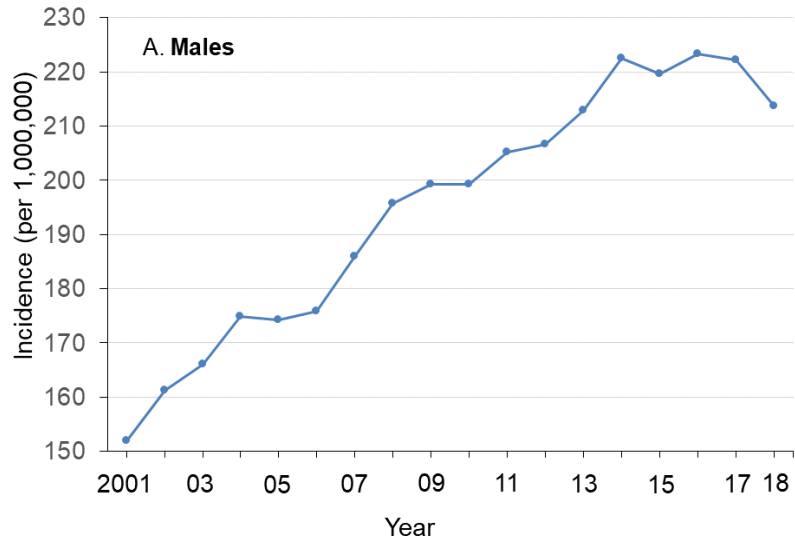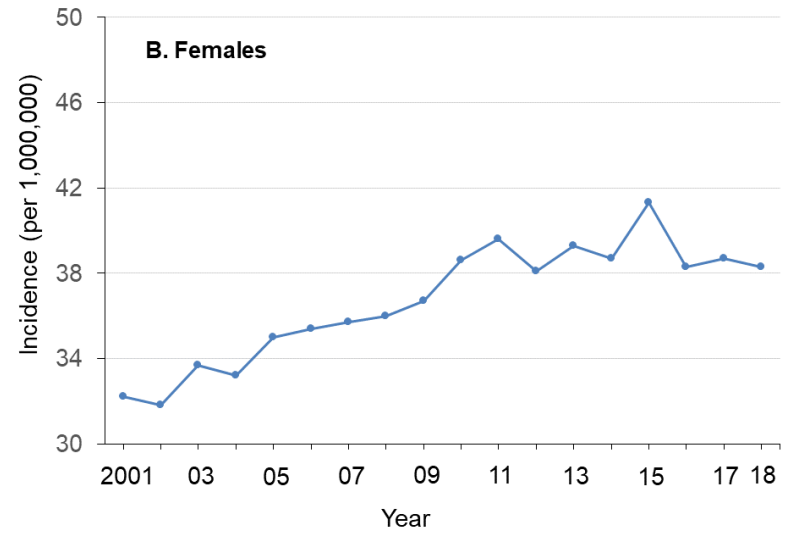

**Supplemental Figure 2.** Age-adjusted incidence of HPV-related oropharyngeal squamous cell carcinoma (OPSCC) from 2001 to 2018 among adults 65+ years old, stratified by sex. A: Males B: Females

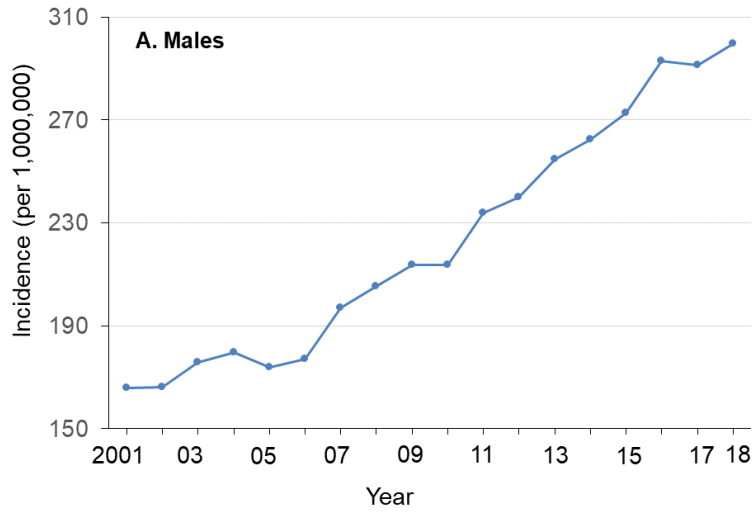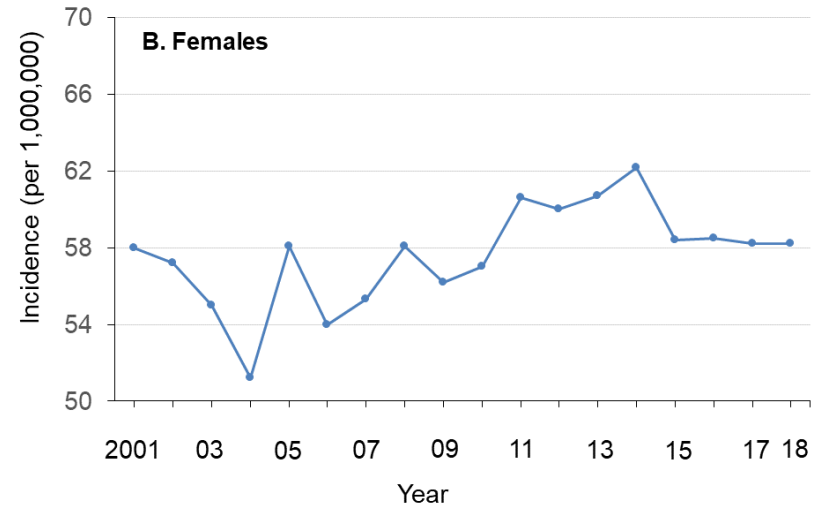

**Supplemental Figure 3.** Five-year cumulative probability of death from HPV-related oropharyngeal squamous cell carcinoma (OPSCC) among cancer patients 45-64 years old with HPV-related OPSCC, SEER 2002-2006 and 2009-2013, stratified by sex. A: Males B: Females

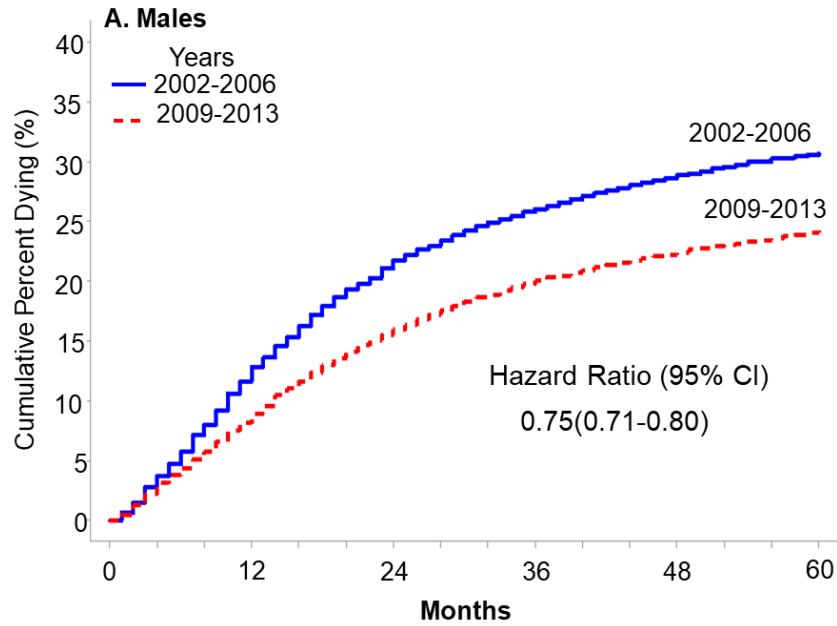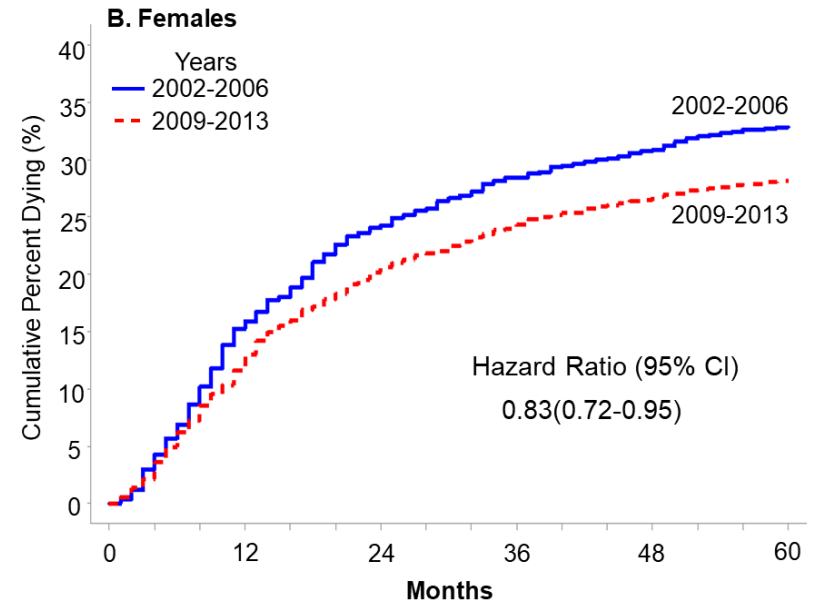

**Supplemental Figure 4.** Five-year cumulative probability of death from HPV-related oropharyngeal squamous cell carcinoma (OPSCC) among cancer patients 65+ years old with HPV-related OPSCC, SEER 2002-2006 and 2009-2013, stratified by sex. A: Males B: Females

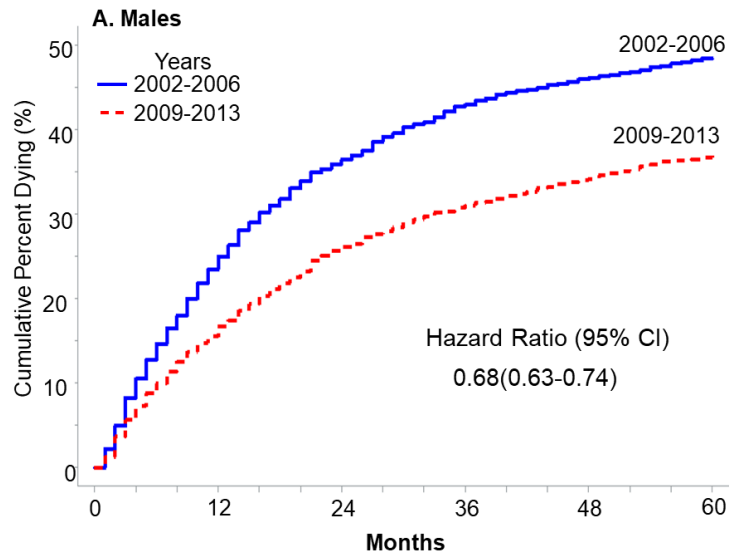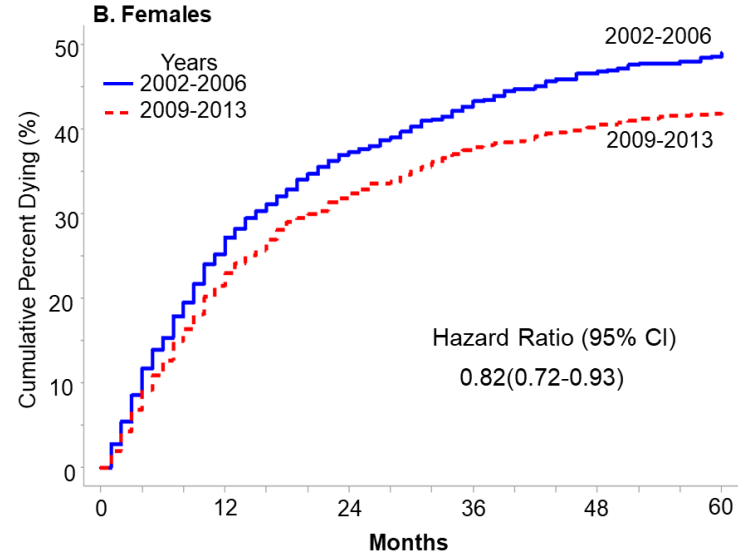

Supplement: DataSheet_1.pdf [file DataSheet_1.pdf]
